# Supplementary material for: Does p-type ohmic contact exist in WSe2–metal interfaces?
Source: Royal Society of Chemistry journal article supplement (doi:10.1039/c5nr06204g), 2015-11-23
Supplement: c5nr06204g1.pdf [file c5nr06204g1.pdf]

## Supplementary Information

### Does P-type Ohmic Contact Exist in WSe<sub>2</sub>-metal Interfaces?

Yangyang Wang,<sup>1,3,†</sup> Ruo Xi Yang,<sup>1,4,†</sup> Ruge Quhe,<sup>1,5,6,†</sup> Hongxia Zhong,<sup>1,7,†</sup> Linxiao Cong,<sup>1</sup> Meng Ye,<sup>1</sup>  
Zeyuan Ni,<sup>1</sup> Zhigang Song,<sup>1</sup> Jinbo Yang,<sup>1,2</sup> Junjie Shi,<sup>1</sup> Ju Li,<sup>3</sup> and Jing Lu<sup>1,2,\*</sup>

<sup>1</sup> State Key Laboratory for Mesoscopic Physics and Department of Physics, Peking University,  
Beijing 100871, P. R. China

<sup>2</sup> Collaborative Innovation Center of Quantum Matter, Beijing 100871, P. R. China

<sup>3</sup> Department of Nuclear Science and Engineering and Department of Materials Science and  
Engineering, Massachusetts Institute of Technology, Cambridge, Massachusetts 02139, USA

<sup>4</sup> Department of Chemistry, University of Bath, Claverton Down, Bath BA2 7AY, UK

<sup>5</sup> State Key Laboratory of Information Photonics and Optical Communications & School of Science,  
Beijing University of Posts and Telecommunications, Beijing 100876, China

<sup>6</sup> Academy for Advanced Interdisciplinary Studies, Peking University, Beijing 100871, China

<sup>7</sup> Department of Physics, Washington University in St. Louis, St. Louis, Missouri 63130, USA

<sup>†</sup>These authors contributed equally to this work.

\*Address correspondence to: [jinglu@pku.edu.cn](mailto:jinglu@pku.edu.cn)

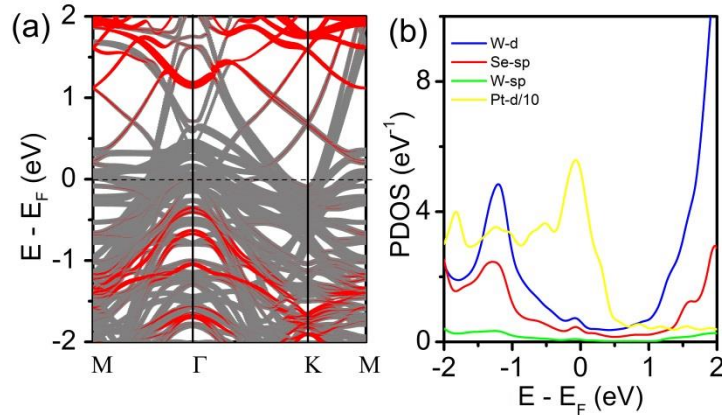

**Figure S1.** (a)  $d$ -orbital projected band structure of the ML  $\text{WSe}_2$ -Pt contact. Gray and red lines represent the  $d$ -orbitals of metal surface and W atoms, respectively. The line width is proportional to the weight. (b) Partial density of states (PDOS) of W- $d$ , Se- $sp$ , W- $sp$ , Pt- $d$  electron orbitals in the ML  $\text{WSe}_2$ -Pt contact, respectively. The PDOS of Pt- $d$  is given as the one-tenth of the origin values.

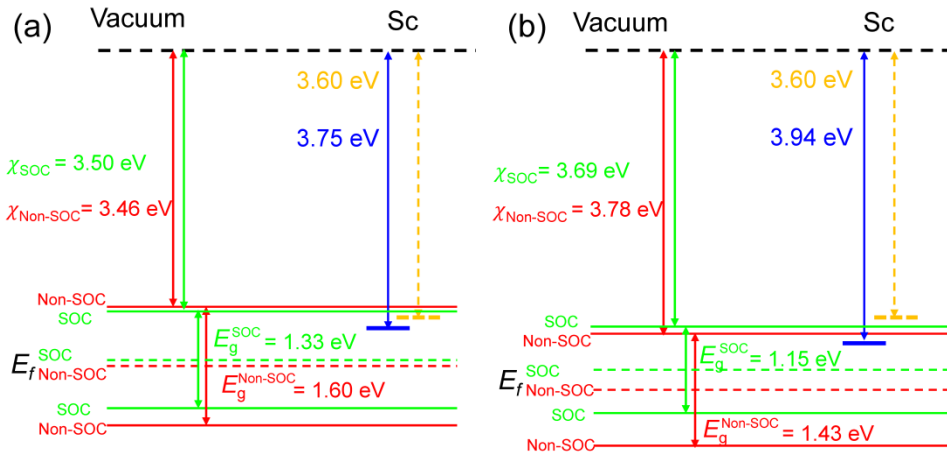

**Figure S2.** Line-up of the Fermi level of metal Sc with electronic bands of free-standing (a) ML and (b) BL  $\text{WSe}_2$  in terms of the calculated work function at the DFT level with (green lines) and without (red lines) inclusion of the SOC effects. The blue lines represent the Fermi level of absorbed system, and the yellow dashed lines represent the Fermi level of pure metal. Note that the work functions of the combined systems are insensitive to the SOC effects, for example,  $W$  of ML  $\text{WSe}_2$ -Sc complex is only increased by 0.05 eV after considering the SOC effects.

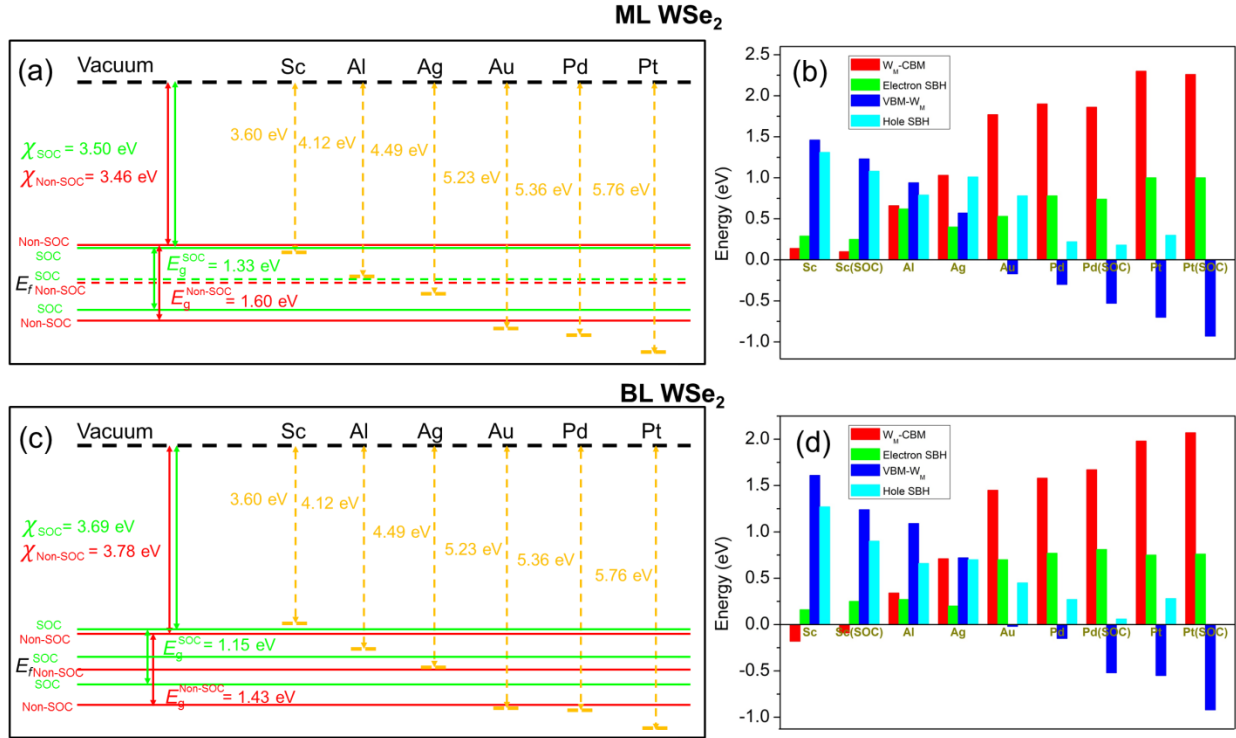

**Figure S3.** (a) Band alignments between ML WSe<sub>2</sub> and various metals. The yellow dashed lines represent the Fermi levels of different pure metals. (b) The differences between metal work function and CBM (VBM) of ML WSe<sub>2</sub> are compared with the electron (hole) SBHs obtained by our energy band calculations. (c) same as (a), and (d) same as (b) just for BL WSe<sub>2</sub> cases.

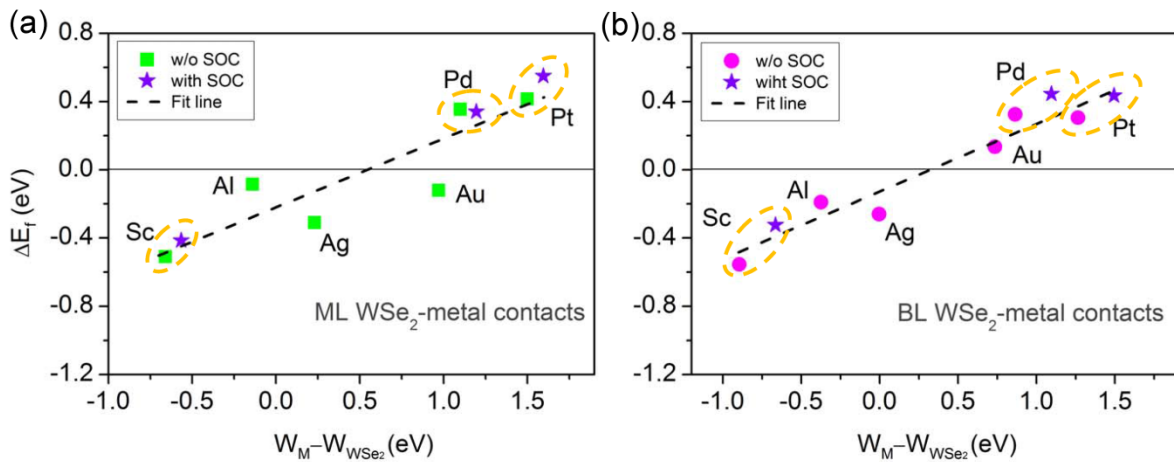

**Figure S4.** Calculated Fermi level shift  $\Delta E_f$  in the (a) ML and (b) BL WSe<sub>2</sub>-metal contacts as a function of  $W_M - W_{WSe_2}$ , the difference between the work functions of clean metal and ML or BL WSe<sub>2</sub> at the DFT level. The dashed lines are the fit curves to all the data in the plot.

Note that the bands bend in the opposite sense in 2D WSe<sub>2</sub>-metal and the corresponding *n*-type or *p*-type conventional bulk semiconductor-metal blocking contacts. This difference arises from the opposite charge flowing directions in these two cases. Take *n*-type SBH as an example, donor states are absent in the 2D WSe<sub>2</sub>, and electrons flow from metal to 2D WSe<sub>2</sub> leaving WSe<sub>2</sub> *n*-type doped because  $\chi_{\text{WSe}_2} < W_{\text{M}} < W_{\text{WSe}_2}$  (Figure S3a), while the electrons flow from *n*-type conventional semiconductor to metal leaving the semiconductor positively charged within a depletion region (the positive charge residing on the ionized donor atoms) because  $W_{\text{M}} > W_{\text{SemiS}}$  (Figure S3b). The opposite band bending is a response to the opposite internal electrical field that results from the charge separation at the junction. This different bending behavior is not limited in WSe<sub>2</sub>-metal contacts, but a general phenomenon in 2D material-metal contacts. Another difference between 2D material-metal and conventional bulk semiconductor-metal contacts should also be noticed. In 2D material-metal contacts, the band bending of the same doping type Ohmic and Schottky contacts are the same; by contrast, in conventional bulk semiconductor-metal contacts, the band bending of the same doping type Ohmic and Schottky contacts are opposite. The reason lies in the same (opposite) charge flowing directions in the same doping type Ohmic and Schottky 2D material (conventional bulk semiconductor)-metal contacts.

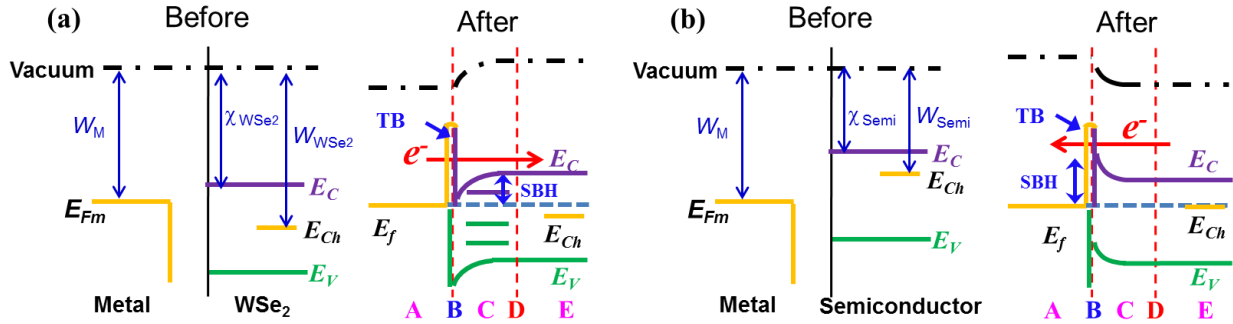

**Figure S5.** Illustrations of the band bending of *n*-type SBHs that occur at (a) WSe<sub>2</sub>-metal and (b) *n*-type conventional semiconductor-metal contacts.  $E_{Fm}$ ,  $E_{Ch}$  and  $E_f$  denote the Fermi levels of the clean metal, uncontacted channel and absorbed system, respectively. Red arrows indicate the direction of electron flow.  $W_{\text{M}}$ ,  $W_{\text{WSe}_2}$ , and  $W_{\text{Semi}}$  are the work functions for clean metal surface, 2D WSe<sub>2</sub>, and conventional bulk semiconductor, respectively.
